# Supplementary material
Source: ML conference proceedings conference paper supplement (https://proceedings.neurips.cc/paper_files/paper/2022/hash/16415eed5a0a121bfce79924db05d3fe-Abstract.html)
Supplement: Supplementary file 1 [file 16415eed5a0a121bfce79924db05d3fe-Supplemental-Conference.zip]

Archive with 2 entries (2 files):
- supp_video.mp4
- Supplementary_Material_of_Geo_Neus.pdf
